# Supplementary material for: Who is stressed and who is driven? A latent profile analysis of career growth among early-career operating room nurses
Source: Research Square preprint supplement (doi:10.21203/rs.3.rs-8165900/v1), 2025-12-17
Supplement: Supplementary file 1 [file 54dbd4959e972711f8b5930f.docx]

**Table S2.** Content validity evaluation of the preliminary item pool by six experts

| Variable | Classification | I-CVI (N = 6) |
| --- | --- | --- |
| Sex | Male | .83 |
| Female |
| Age (years) | 20-25 | 1.00 |
| 26-30 |
| ≥31 |
| Educational attainment | Secondary vocational school | 1.00 |
| Associate degree |
| Bachelor’s degree |
| Master’s degree |
| Doctoral degree |
| Only-child status | Yes | .83 |
| No |
| Marital status | Single | .83 |
| Married |
| Divorced |
| Widowed |
| Parenthood (has children) | Yes | 1.00 |
| No |
| Hospital tier | Tertiary A | 1.00 |
| Tertiary B |
| Homeownership status | Yes | 1.00 |
| No |
| Specialty nurse certification (obtained) | Yes | 1.00 |
| No |
| Monthly income (CNY) | ≤4,000 | .67 |
| 4,001-6,000 |
| 6,001-8,000 |
| 8,001-10,000 |
| ＞10,000 |
| Professional rank | Registered nurse | 1.00 |
| Senior nurse |
| Charge nurse |
| Number of night shifts per month | ＜5 | 1.00 |
| 5-9 |
| ＞9 |
| Operating-room nursing tenure | 3 months-1 year | 1.00 |
| 1-3 years |
| 3-5 years |
| Employment type | Establishment post | 1.00 |
| Non-establishment post |
| Self-rated health | Poor | .83 |
| Fair |
| Good |
| Very good |
| Excellent |
| Interest in the nursing profession | Not at all interested | .83 |
| Slightly interested |
| Moderately interested |
| Very interested |
| Extremely interested |

Note: Six subject‑matter experts independently rated item relevance on a 4‑point scale (1 = Not relevant, 4 = Highly relevant). The average scale‑level content validity index (S‑CVI/Ave) was .93.
