# Supplementary material for: Who is stressed and who is driven? A latent profile analysis of career growth among early-career operating room nurses
Source: Research Square preprint supplement (doi:10.21203/rs.3.rs-8165900/v1), 2025-12-17
Supplement: Supplementary file 2 [file 55643dc9da0a9408250012e7.docx]

**Supplementary File 1.** Structured questionnaire.

**Sociodemographic and Job Characteristics**

1. Sex:

① Male; ② Female

2. Age (years):

① 20-25; ② 26-30; ③ ≥31

3. Educational attainment:

① Secondary vocational school; ② Associate degree; ③ Bachelor’s degree; ④ Master’s degree; ⑤ Doctoral degree

4. Only-child status:

① Yes; ② No

5. Marital status:

① Single; ② Married; ③ Divorced; ④ Widowed

6. Parenthood (has children):

① Yes; ② No

7. Hospital tier:

① Tertiary A; ② Tertiary B

8. Homeownership status:

① Yes; ② No

9. Specialty nurse certification (obtained):

① Yes; ② No

10. Monthly income (CNY):

① ≤4,000; ② 4,001-6,000; ③ 6,001-8,000; ④ 8,001-10,000; ⑤ >10,000

11. Professional rank:

① Registered nurse; ② Senior nurse; ③ Charge nurse

12. Number of night shifts per month:

① <5; ② 5-9; ③ >9

13. Operating-room nursing tenure:

① 3 months-1 year; ② 1-3 years; ③ 3-5 years

14. Employment type:

① Establishment post (permanent); ② non-establishment post (contract)

15. Self-rated health:

① Poor; ② Fair; ③; Good ④;Very good ⑤ Excellent

16. Interest in the nursing profession:

① Not at all interested; ② Slightly interested; ③ Moderately interested; ④ Very interested; ⑤ Extremely interested

**Career Growth Scale for Nurses (CGNS)**

The CGNS comprises three dimensions: career goal progress (4 items), professional ability improvement (4 items), and career development opportunity (7 items). Higher scores indicate greater career growth. Response options: 1-5 Likert: 1 = Strongly disagree, 2 = Disagree, 3 = Uncertain, 4 = Agree, 5 = Strongly agree

1. My current job brings me closer to my career goals.

2. My current job is related to my career goals and ideals.

3. My current job lays the foundation for achieving my career goals.

4. My current job provides good development opportunities.

5. My current job prompts me to master new work-related skills.

6. My current job prompts me to continually acquire new work-related knowledge.

7. My current job prompts me to accumulate richer work experience.

8. My current job continually exercises and enhances my professional competence.

9. At my current organization, the pace of promotion is relatively fast.

10. At my current organization, the likelihood of promotion is high.

11. At my current organization, my position is more ideal than at my previous employer.

12. Compared with my colleagues, my career advancement is relatively fast.

13. Since joining my current organization, my salary has increased rather quickly.

14. At my current organization, my salary is likely to continue rising.

15. Compared with my colleagues, my salary growth is relatively fast.

**General Self‑Efficacy Scale (GSE)**

The instrument comprises 10 items and demonstrates a single-factor structure. Higher scores indicate stronger general self-efficacy. Response options: 1-4 Likert: 1 = Not at all true, 2 = Hardly true, 3 = Moderately true, 4 = Exactly true

1. If I try hard enough, I can always solve problems.

2. Even if others oppose me, I have ways to obtain what I want.

3. For me, holding to ideals and attaining goals is comparatively easy.

4. I am confident that I can deal effectively with any unexpected events.

5. Given my capabilities, I can handle unforeseen situations.

6. If I make the necessary effort, I can solve most difficulties.

7. I can face difficulties calmly because I trust my problem‑solving ability.

8. When confronted with a problem, I can usually think of several solutions.

9. When there is trouble, I can usually come up with ways to cope.

10. Whatever happens to me, I can handle it well.

**Thriving at Work Scale (TWS)**

The instrument contains 10 items across two dimensions, vitality (5 items) and learning (5 items), and items 4 and 8 are negatively worded. Higher scores indicate greater thriving. Response options: 1-7 Likert: 1 = Completely inconsistent, 2 = Inconsistent, 3 = Somewhat inconsistent, 4 = Neutral, 5 = Somewhat consistent, 6 = Consistent, 7 = Completely consistent

1. I proactively learn relevant knowledge at work.

2. Over time, I learn more at work.

3. I find myself continually improving at work.

4. At work, I do not learn relevant knowledge.

5. I have achieved considerable personal growth at work.

6. I feel energized at work.

7. When working, I feel full of energy and drive.

8. At work, I feel exhausted.

9. At work, I maintain a clear mind and flexible thinking.

10. I look forward to the new day.

**Chinese Employee Organizational Commitment Scale (CEOCS)**

The instrument comprises 25 items across five dimensions: affective commitment (5 items), normative commitment (5 items), ideal commitment (5 items), economic commitment (5 items), and opportunity commitment (5 items). Higher scores indicate stronger organizational commitment. Response options: 1-4 Likert: 1 = Strongly disagree, 2 = Partially disagree, 3 = Agree, 4 = Strongly agree

1. I do not want to leave my current hospital under any circumstances.

2. Everyone should fulfil their obligations to their workplace.

3. My main reason for working in my current hospital is to apply what I have learned.

4. I do not leave my current hospital because I worry about losing many benefits.

5. With my current knowledge and skills, it would be difficult to find a better hospital.

6. I stay and work hard mainly because I have affection for this hospital.

7. I do not plan to leave my current hospital because I believe job‑hopping is unethical.

8. My current job provides me with many opportunities for further study.

9. If I really left my current organization, it would cause great losses to my life.

10. I continue to stay because salaries and bonuses elsewhere may not be as high.

11. I am willing to make any contribution to the hospital’s development.

12. Everyone should be loyal to their employing organization.

13. My current hospital can offer me more opportunities for promotion.

14. Pressures from life and family make me must stay in this hospital.

15. I stay mainly because jobs suitable for me are not easy to find.

16. I am willing to devote all my efforts to the hospital.

17. I am a member of the hospital and therefore should invest myself fully in it.

18. The work I do is challenging.

19. I have spent many years, much time and energy in this hospital; if I left now, the loss would be too great.

20. If I left my current hospital, I would have almost no other options.

21. I am willing to make extra effort for the hospital.

22. The workplace is my bread and butter. I should cherish it as I cherish my own home.

23. I stay and work hard mainly to realise my ideals.

24. If I left the hospital, it would cause great losses to my family.

25. For me, finding a job is not difficult, but finding one with good overall conditions is not easy.

**Work–Family Support Scale (WFSS)**

The instrument comprises 30 items across four dimensions: organizational support (8 items), leadership support (8 items), emotional support (7 items), and instrumental support (7 items). Higher scores indicate greater work-family support. Response options: 1-5 Likert: 1 = Strongly disagree, 2 = Disagree, 3 = Uncertain, 4 = Agree, 5 = Strongly agree

1. The organization recognizes our work achievements.

2. The organization evaluates performance according to task difficulty.

3. The organization provides flexible time so that we can handle work and family matters.

4. When I encounter pressure and obstacles at work, the organization encourages and helps me.

5. The organization provides a good staffing environment, cares about us, and often talks with us.

6. The organization meets our material and cultural needs and creates a pleasant working environment.

7. When family issues cause mistakes at work, the organization offers understanding as appropriate.

8. The organization provides good welfare benefits.

9. There is a nursery (or similar facility) near our workplace.

10. The organization provides information about eldercare and children’s education.

11. I feel comfortable talking with my supervisor about my family life.

12. When my family or personal matters affect work, my supervisor understands me.

13. My supervisor usually cares about me.

14. My work achievements are often affirmed and praised by my supervisor.

15. When my family needs me, my supervisor allows me to go home early.

16. When my family encounters difficulties, the organization provides help.

17. When I encounter problems at work, my supervisor judges according to the situation and does not merely criticise.

18. My supervisor grants leave at appropriate times so that we can reunite with our families.

19. My supervisor pays attention to how work demands affect me and my family.

20. The organization often arranges activities beneficial to employees’ physical and mental health, such as parties or sports events.

21. My family often provides different opinions and views on my work problems.

22. When I have troubles at work, my family always understands my feelings.

23. When difficulties arise at work, my family always shares the burden with me.

24. When I am tired from work, my family always encourages me.

25. When I encounter problems at work, I always talk to my family.

26. When problems arise at work, my family always comforts me.

27. Outside work, my family gives me some personal space.

28. When I am very busy with work for a period, my family takes on more housework.

29. I feel comfortable discussing work‑related issues with my family.

30. My family is quite interested in the work I do.

**Organizational Career Management Questionnaire (OCMQ)**

The instrument comprises 16 items across four dimensions: promotion fairness (4 items), emphasis on training (4 items), provision of career information (4 items), and facilitating organizational development (4 items). Higher scores indicate more favorable organizational career management. Response options: 1-4 Likert: 1 = Not consistent, 2 = Somewhat inconsistent, 3 = Somewhat consistent, 4 = Consistent

1. The hospital promotes nurses based on their overall abilities.

2. The hospital provides regular or ad hoc in‑service training for nurses.

3. Supervisors promote subordinates whom they consider to perform well.

4. The hospital helps nurses choose their career development direction.

5. The hospital provides learning conditions and materials for nurses.

6. The hospital provides fair opportunities and platforms for competition.

7. The hospital publicly releases information on internal job vacancies to nurses.

8. The hospital provides funding for nurses’ academic education.

9. The hospital promotes nurses according to their work performance.

10. The hospital rotates posts for nurses to enrich their work experience.

11. The hospital sets up a nursing competence assessment centre to identify nurses’ potential.

12. The hospital arranges experienced staff to mentor nurses.

13. The hospital plans specific career development programmes for nurses.

14. The hospital provides nurses with information on qualification requirements for various posts.

15. The hospital offers opportunities for external study.

16. The hospital provides multiple career advancement pathways (e.g., nursing management, research, education, specialist).
