# Supplementary material for: Who is stressed and who is driven? A latent profile analysis of career growth among early-career operating room nurses
Source: Research Square preprint supplement (doi:10.21203/rs.3.rs-8165900/v1), 2025-12-17
Supplement: Supplementary file 3 [file 9fe10bd78eabf63dcf209ee9.docx]

**Table S3.** Coding and assignment of independent variables included in multivariable analyses

| Independent variable | Coding and value assignment |
| --- | --- |
| Age (years) | 20-25 = 1; 26-30 = 2; ≥ 31 = 3 |
| Educational attainment | Secondary vocational school = 1; Associate degree = 2; Bachelor’s degree = 3; Master’s degree = 4; Doctoral degree = 5 |
| Only-child status | Yes = 1; No = 2 |
| Marital status | Yes = 1; No = 2 |
| Parenthood (has children) | Yes = 1; No = 2 |
| Hospital tier | Tertiary A = 1; Tertiary B = 2 |
| Specialty nurse certification (obtained) | Yes = 1; No = 2 |
| Monthly income (CNY) | ≤4,000 = ; 4,001-6,000 = 2; 6,001-8,000 = 3; 8,001-10,000 = 4;＞10,000 = 5 |
| Professional rank | Registered nurse = 1; Senior nurse = 2; Charge nurse = 3 |
| Number of night shifts per month | ＜5 = 1; 5-9 = 2; ＞9 = 3 |
| Operating-room nursing tenure | 3 months-1 year = 1; 1-3 years = 2; 3-5 years = 3 |
| Employment type | Establishment post = 1; Non-establishment post = 2 |
| Self-rated health | Poor = 1; Fair = 2; Good = 3; Very good = 4; Excellent = 5 |
| Interest in the nursing profession | Not at all interested = 1; Slightly interested = 2; Moderately interested = 3; Very interested = 4; Extremely interested = 5 |

Note. Coding represents the categorical value assignments used in the multinomial logistic regression analysis. Higher numeric codes do not indicate higher levels of the variable but are assigned for analytical purposes only.
